# Supplementary material for: Preparation of hollow porous Co-doped SnO2 microcubes and their enhanced gas sensing property
Source: Royal Society of Chemistry journal article supplement (doi:10.1039/c3ce41148f), 2013-01-01
Supplement: c3ce41148f.pdf [file c3ce41148f.pdf]

Supplementary Material (ESI) for CrystEngComm  
This journal is (c) The Royal Society of Chemistry 2011

Electronic Supplementary Informations

**Preparation of hollow porous Co-doped SnO<sub>2</sub> microcubes and their  
enhanced gas sensing property**

Jiarui Huang<sup>1,\*</sup>, Liyou Wang<sup>1</sup>, Cuiping Gu<sup>1,\*</sup>, Muheng Zhai<sup>1</sup> and Jinhuai Liu<sup>2</sup>

<sup>1</sup> College of Chemistry and Materials Science, Anhui Key Laboratory of Functional  
Molecular Solids, Anhui Normal University, Wuhu, 241000, P.R. China

<sup>2</sup> Research Center for Biomimetic Functional Materials and Sensing Devices, Institute of  
Intelligent Machines, Chinese Academy of Sciences, Hefei 230031, P.R. China

Corresponding author. E-mail: jrhuang@mail.ahnu.edu.cn; cpgu2008@mail.ahnu.edu.cn;  
sunyufeng118@126.com.

Phone. +86-553-3869-303. Fax. +86-553-3869-303.

---

\* Corresponding author. E-mail: jrhuang@mail.ahnu.edu.cn (J.R. Huang);  
cpgu2008@mail.ahnu.edu.cn (C.P. Gu). Phone. +86-553-3869-303. Fax. +86-553-3869-303.

Supplementary Material (ESI) for CrystEngComm  
This journal is (c) The Royal Society of Chemistry 2011

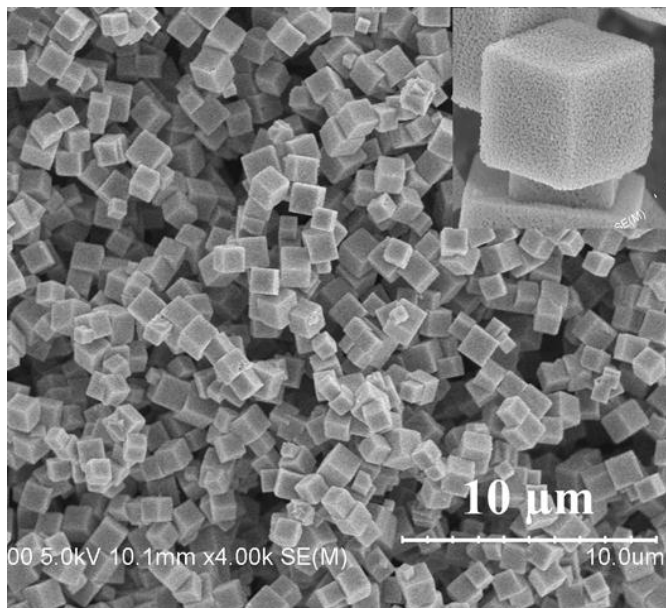

**Figure S1.** SEM image of the porous Co-doped SnO<sub>2</sub> microcubes.

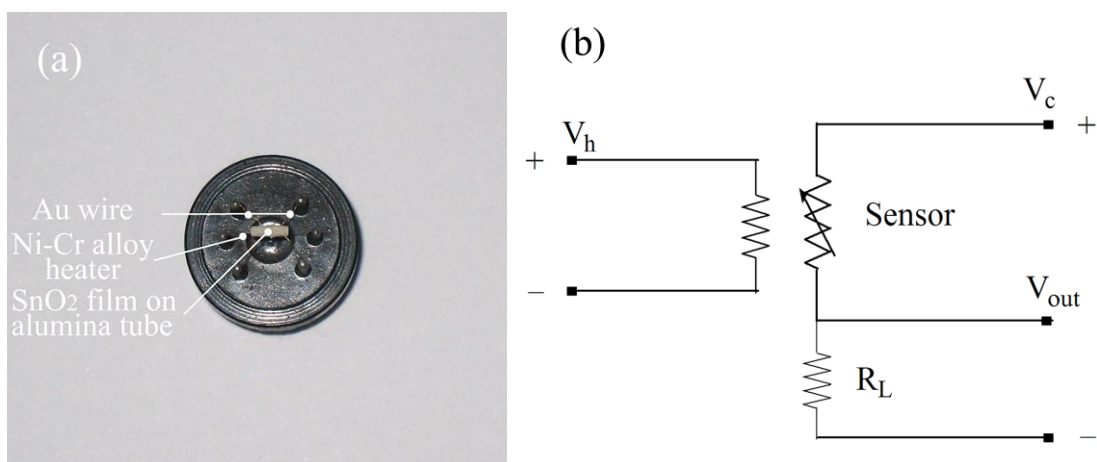

**Figure S2.** Photograph of the sensor (a), and test principle of the gas sensing measurement system (b) ( $V_h$ : heating voltage;  $V_c$ : circuit voltage;  $V_{out}$ : signal voltage and  $R_L$ : load resistor).
